# Supplementary material for: Identifying transgene insertions in Caenorhabditis elegans genomes with Oxford Nanopore sequencing
Source: PeerJ journal article supplement (doi:10.7717/peerj.18100), 2024-09-13
Supplement: STable1.pdf [file STable1.pdf]

**Table S1.** Sequencing statistics for UA44 and BY250 before and after Canu-Correction. Canu-corrected reads were used to assemble the genomes with Flye.

| Additional Sequencing Statistics |                  |                 |                  |                    |          |          |
|----------------------------------|------------------|-----------------|------------------|--------------------|----------|----------|
|                                  | Total Bases (Gb) | Number of Reads | Mean Read Length | Median Read Length | N50      | Coverage |
| UA44                             | 7.44             | 2,673,711.0     | 2,783.80         | 1,564.00           | 4,732.0  | 74.22    |
| Corrected                        | 3.88             | 597,106.00      | 6,498.10         | 4,190.0            | 8,082.0  | 38.69    |
| BY250                            | 12.45            | 4,054,501.0     | 3,070.00         | 1,540.00           | 6,116.0  | 124.12   |
| Corrected                        | 4.10             | 344,582.0       | 11885.10         | 10,929.0           | 15109.00 | 40.84    |
